# Supplementary material for: Novel heteroditopic chelate for self-assembled gadolinium(iii) complex with high relaxivityElectronic Supplementary Information (ESI) available: synthesis and analytical data for tpy-DTTA4? and for the complexes. See http://www.rsc.org/suppdata/cc/b4/b400169a/
Source: Royal Society of Chemistry journal article supplement (doi:10.1039/b400169a), 2004-01-01
Supplement: b400169a.doc [file b400169a.doc]

Novel heteroditopic chelate for self-assembled gadolinium(III) complex with high relaxivity†

Robert Ruloff,*a* Gerard van Koten*b* and André E. Merbach**a*

a Ecole Polytechnique Fédérale de Lausanne, Institut de Chimie Moléculaire et Biologique, BCH

Lausanne, Switzerland. Fax: 41 21 693 9875; Tel: 41 21 693 9871; E-mail: [andre.merbach@epfl.c](mailto:andre.merbach@epfl.c)h

b Utrecht University, Debye Institute, Department of Metal-Mediated Synthesis, Padualaan 8, Utrecht,

*The Netherlands. Fax: 31 30 252 3615; Tel: 31 30 253 3120; E-mail: g.vankoten@chem.uu.nl*

Electronic Supplementary Information (ESI):

***Synthesis and analytical data for the ligand tpy-DTTA4-:***

**Substitution of Cl-tpy with protected diethylene triamine (i).** 1.64 g (6.12 mmol) 4’-Chloro-2,2’:6’,2”-terpyridine (99%, Aldrich) and 3.33 g (9.18 mmol) protected triamine (N,N’’-bis(phthalimido)diethylenetriamine synthesized according to C.-Y. Ng, R. J. Motekaitis, A. E. Martell, *Inorg. Chem.* **1979**, *18*, 2982) were powdered, mixed and dried under high vacuum. The powder was sealed in glass tubes under inert atmosphere (inner pressure slightly reduced [0.50.7 atm]) and heated in an oil bath at 180 °C for 16 hours. (*Remark 1:* The tubes have to be completely immersed in the oil bath; if not, Cl-tpy will sublimate to the colder parts of the tubes! *Remark 2:* Alternatively, an oven with precise temperature control could be used for heating.) After cooling to room temperature the sealed glass tubes were cleaned and opened and the product was dissolved in 150 ml CHCl3 in the presence of ca. 2 g K2CO3. The solution was filtered off, evaporated to dryness and dried under high vacuum. The brown solid product (4.25 g) was directly used for the next step without further purification. For 1H NMR (200 MHz, CHCl3 = 7.30 ppm) 20 mg of the brown solid were dissolved in a stirred mixture of 1 ml 10 M aq. NaOH and 2 ml CH2Cl2. The organic phase was separated, dried with Na2SO4, evaporated to dryness, dried at reduced pressure and dissolved in CDCl3; : 3.93 (t, *J* = 5.8 Hz, 4H), 4.06 (t, *J* = 5.8 Hz, 4H), 7.33 (m, 2 H), 7.60-7.68 (m, 4H), 7.70-7.86 (2m, 4H + 2H), 7.93 (s, 2H), 8.45 (d, *J* = 7.9 Hz, 2H), 8.75 (dt, *J* = 4.7/1.0 Hz, 2H).

**Deprotection of substituted tpy (ii).** All brown product from the first step was refluxed in 250 ml of a 6 M HCl solution for 16 hours and then evaporated to dryness. The residue was dissolved in a mixture of 150 ml aqueous 5 M NaOH and 150 ml CHCl3. The organic phase was separated and the aqueous phase was extracted with three portions of 100 ml CHCl3. All organic phases were pooled, washed with two portions of 100 ml saturated NaCl solution, dried with Na2SO4, filtered and evaporated to dryness. The product tpy-dien was obtained as a brown yellow oil (1.84 g, yield 90 % [repetitions gave yields between 85 and 95 %], purity 90-95 % [according 1H NMR]) and was used for the next step without further purification. 1H NMR (200 MHz, D2O, + DCl, pD = 1.5, HDO = 4.80 ppm) : 3.39 (t, *J* = 7.1 Hz, 4H), 4.07 (t, *J* = 7.1 Hz, 4H), 7.85 (s, 2H), 8.17 (m, 2H), 8.77 (m, 2H), 8.89 (d, *J* = 8.2 Hz, 2H), 8.97 (d, *J* = 5.5 Hz, 2H).

**Carboxymethylation of tpy-dien (iii).** 1.84 g (5.51 mmol) tpy-dien were dissolved in 40 ml dry DMF. 6.45 g (33.1 mmol) *tert*-Butyl bromoacetate (99%, Acros) and 9.14 g (66.1 mmol) dry K2CO3 were added successively to the stirred solution. The mixture was stirred at room temperature for two days and then evaporated to dryness. The residue was dissolved in 150 ml CHCl3 and the solution was filtered. Remaining residue was treated with another 50 ml CHCl3 and filtered. All filtrates were evaporated to dryness and dried under high vacuum to give crude tpy-DTTA-tetra-*t*-butyl ester as a brown oil (4.87 g) that was directly used for the next step without further purification.

**Hydrolysis of tpy-DTTA-tetra-*t*-butyl ester (iv/1.).** 4.87 g Tpy-DTTA-tetra-*t*-butyl ester from the previous step was refluxed in 200 ml of a 6 M HCl solution for 14 hours and then evaporated to dryness. The residue was dissolved in 100 ml of water and the mixture was evaporated to dryness again. All residue was dissolved in 25 ml of water and a 10 M NaOH solution was added dropwise to adjust a final pH of 2.80. After 2 days of crystallization at 4 °C the precipitate was filtered off, washed with ca. 10 ml of cold water and dried at reduced pressure to give the crude product H4(tpy-DTTA) as a brown-yellow solid (2.06 g, overall yield 59 % [repetitions gave 5065 %], contains 1015 % impurities [carboxymethylation products of lower substitution degree]).

**Final purification by anion-exchange chromatography (iv/2.).** All crude H4(tpy-DTTA) from the previous step was dissolved in ca. 12 ml of a 1 M NH3 solution, filtered and loaded onto an anion-exchange column (Bio-Rad AG 1-X4, converted into HCOO form, 3.0  10.0 cm). The column was washed with water until the eluate had a pH of 7 and the product was eluated with a pH gradient (0.5 M NH4HCOO + aq. NH3) starting at pH = 5.5 to a final pH of 4.5. The presence of tpy-DTTA4 in the eluate was determined by a FeII test and by 1H NMR. All fractions containing tpy-DTTA4 were pooled and evaporated to dryness (*Remark:* Fractions containing more then 3% of side products were pooled for recycling). The residue was dissolved in a minimum of water and the pH was adjusted to 2.80 by dropwise addition of concentrated HCl. The product crystallized at 4 °C, after 3 days it was filtered off and dried under reduced pressure to give a white powder (460 mg) that contained ca. 0.1 mol HCOOH per 1 mol H4(tpy-DTTA). Recrystallization from 20 ml H2O removed the trace of HCOOH completely. The final product was dried at reduced pressure and then stored at air until the weight was constant to give 450 mg (overall yield 10 %) H4(tpy-DTTA)7.5 H2O (purity > 97 %). *Remark:* Repeated ion-exchange with recycled product gave another 400500 mg of product (final overall yield [purity > 97%] ca. 20 %). 1H NMR (400 MHz, D2O) : 3.64 (t, *J* = 6.6 Hz, 4H), 3.96 (s, 8H), 4.21 (t, *J* = 6.6 Hz, 4H), 7.88 (s, 2H [3’,5’]), 8.12 (m, 2H [5,5”]), 8.74 (m, 2H [4,4”]), 8.85 (d, *J* = 8.2 Hz, 2H [3,3”]), 8.92 (d, *J* = 5.5 Hz, 2H [6,6”]); MS (ESI): *m/z*: 567.4 (MH+); elemental analysis calc (%) for C27H30N6O87.5H2O: C 46.22, N 11.98, H 6.46, found: C 46.15, N 12.15, H 6.63.

***Preparation of the complexes and analytical data:***

**[Fe(tpy-DTTA)2]6.** *General procedure:* By mixing solid ligand (0.20 mmol) and Fe(NH4)2(SO4)26H2O (0.10 mmol) in water (20 ml) and stirring until all ligand dissolved. Deep violet complex forms instantly. Sample for 1H NMR (400 MHz) evaporated to dryness and dissolved in D2O (pD ca. 4); : 3.78 (t[br], 4H), 3.96 (s, 8H), 4.39 (t[br], 4H), 7.02 (m, 2H [5,5”]), 7.22 (d, *J* = 5.3 Hz, 2H [6,6”]), 7.76 (m, 2H [4,4”]), 8.30 (s, 2H [3’,5’]), 8.42 (d, *J* = 8.1 Hz, 2H [3,3”]); MS (ESI) *m/z*: 594.3 (for [FeH8(tpy-DTTA)2]2+). *Remark:* Same product formed when following procedure was applied: Dissolving ligand (0.20 mmol) in water (20 ml) by addition of base (aq. NH3, final pH = 8.0), then addition of stock solution of Fe(NH4)2(SO4)26H2O (0.15 mmol), stirring, addition of base (aq. NH3, final pH > 12), after 2 hours without stirring filtration of precipitate (removing FeII excess), evaporation to dryness, dissolving in D2O.

**[Fe(tpy-DTTA)2Eu2].** Addition of solid or stock solution of EuCl36H2O (0.20 mmol) to aqueous solution (20 ml) of [Fe(tpy-DTTA)2]6 (0.10 mmol). Stirring and addition of base (aq. NH3) until pH is 7.1. Concentration of the solution gave a dark violet precipitate that was filtered off and washed two times with cold water. Solid was first dried at reduced pressure and then stored at air until hydration degree was constant. Elemental analysis calc (%) for C54H52Eu2FeN12O1617H2O: C 36.21, H 4.84, N 9.38, Fe 3.12, Eu 16.97, found: C 36.18, H 4.72, N 9.7, Fe 3.01, Eu 16.76. *Remark 1:* Same complex was formed when FeII and EuIII salts/or stock solutions were simultaneously added to a ligand solution followed by adjusting the pH to 7 (addition of aq. NH3). *Remark 2:* For the preparation of the [Fe(tpy-DTTA)2Gd2] solutions GdCl36H2O or a stock solution of this salt were used.

**[EuH(tpy-DTTA)]1.5H2O.** On mixing equimolar amounts of the solid or a stock solution of EuCl36H2O with a ligand solution of tpy-DTTA4 a precipitation of a white product starts immediately and is complete after 515 minutes. The precipitate was filtered off, washed two times with cold water, dried at reduced pressure and then stored at air until the hydration degree was constant. Elemental analysis calc (%) for C27H27EuN6O81.5H2O: C 43.67, H 4.07, N 11.32, found: C 43.85, H 4.12, N 11.26.

***Acknowledgement:*** We thank Prof. Paul Dyson and Antoine Dorcier for the help with the ESI-MS of the complex [Fe(tpy-DTTA)2]6.
